# Supplementary material
Source: HighWire-hosted journal article supplement (http://d2538ggaoe6cji.cloudfront.net/highwire/filestream/44251/field_highwire_adjunct_files/0/149070-1.pdf)
Supplement: 149070-1.pdf [file 149070-1.pdf]

Supplementary Material

Supplementary Table 1. Demographics and GGA and mtDNA haplogroups of the cohort.

| Characteristics                 | Controls<br>(n = 23,743) | Schizophrenia<br>(n = 2,538) |
|---------------------------------|--------------------------|------------------------------|
| Age (Median and range), years   | 23 (12 – 36)             | 28 (17 – 36)                 |
| Sex (Male/Female)               | 12,067 / 11,676          | 1,469 / 1,069                |
| <b>Genogeographic affinity:</b> |                          |                              |
| Danish                          | 20,918 (88.10 %)         | 2,233 (87.98 %)              |
| European                        | 1,584 (6.67 %)           | 195 (7.68 %)                 |
| Middle Eastern                  | 724 (3.05 %)             | 59 (2.32 %)                  |
| Central South Asian             | 365 (1.54 %)             | 44 (1.73 %)                  |
| African                         | 15 (0.06 %)              | 1 (0.04 %)                   |
| Greenlandian                    | 4 (0.02 %)               | 3 (0.12 %)                   |
| <b>mtDNA haplogroup:</b>        |                          |                              |
| H                               | 10,817 (45.6 %)          | 1,153 (45.4 %)               |
| U                               | 3,205 (13.5 %)           | 375 (14.8 %)                 |
| T                               | 2,184 (9.2 %)            | 231 (9.1 %)                  |
| J                               | 2,123 (8.9 %)            | 255 (10.0 %)                 |
| K                               | 1,753 (7.4 %)            | 164 (6.5 %)                  |
| V                               | 796 (3.4 %)              | 81 (3.2 %)                   |
| I                               | 655 (2.8 %)              | 55 (2.2 %)                   |
| R                               | 646 (2.7 %)              | 65 (2.6 %)                   |
| X                               | 390 (1.6 %)              | 25 (1.0 %)                   |
| M                               | 386 (1.6 %)              | 31 (1.2 %)                   |
| W                               | 319 (1.3 %)              | 28 (1.1 %)                   |
| N                               | 296 (1.2 %)              | 62 (2.4 %)                   |
| L                               | 173 (0.7 %)              | 13 (0.5 %)                   |

**Supplementary Table 2. Distribution of mtDNA haplogroups of schizophrenic patients with specific SNPs**

| SNP-allele | Mitochondrial haplogroups (% of each allele) |      |      |      |      |     |      |     |     |      |     |     |      |
|------------|----------------------------------------------|------|------|------|------|-----|------|-----|-----|------|-----|-----|------|
|            | H                                            | U    | T    | J    | K    | V   | I    | R   | X   | M    | W   | N   | L    |
| m.1438A    | 99.2                                         | 0.0  | 0.0  | 0.0  | 0.0  | 0.8 | 0.0  | 0.0 | 0.0 | 0.0  | 0.0 | 0.0 | 0.0  |
| m.1438G    | 42.8                                         | 15.5 | 9.6  | 10.5 | 6.8  | 3.3 | 2.3  | 2.7 | 1.0 | 1.3  | 1.2 | 2.5 | 0.5  |
| m.3197C    | 0.0                                          | 99.0 | 0.0  | 1.0  | 0.0  | 0.0 | 0.0  | 0.0 | 0.0 | 0.0  | 0.0 | 0.0 | 0.0  |
| m.3197T    | 49.5                                         | 7.3  | 9.9  | 10.9 | 7.0  | 3.5 | 2.4  | 2.8 | 1.1 | 1.3  | 1.2 | 2.6 | 0.6  |
| m.3666A    | 20.0                                         | 30.0 | 10.0 | 20.0 | 0.0  | 0.0 | 0.0  | 0.0 | 0.0 | 10.0 | 0.0 | 0.0 | 10.0 |
| m.3666G    | 45.5                                         | 14.7 | 9.1  | 10.0 | 6.5  | 3.2 | 2.2  | 2.6 | 1.1 | 1.2  | 1.1 | 2.5 | 0.5  |
| m.4769A    | 97.4                                         | 1.7  | 0.0  | 0.0  | 0.0  | 0.0 | 0.0  | 0.9 | 0.0 | 0.0  | 0.0 | 0.0 | 0.0  |
| m.4769G    | 42.9                                         | 15.4 | 9.5  | 10.5 | 6.8  | 3.3 | 2.3  | 2.6 | 1.0 | 1.3  | 1.2 | 2.6 | 0.5  |
| m.9377A    | 45.5                                         | 14.9 | 9.2  | 10.1 | 6.2  | 3.2 | 2.2  | 2.6 | 1.0 | 1.2  | 1.1 | 2.5 | 0.5  |
| m.9377G    | 33.3                                         | 0.0  | 0.0  | 0.0  | 46.7 | 0.0 | 0.0  | 0.0 | 0.0 | 13.3 | 0.0 | 0.0 | 6.7  |
| m.10398G   | 0.4                                          | 0.0  | 0.0  | 50.8 | 26.7 | 0.0 | 11.4 | 0.2 | 0.0 | 6.4  | 0.0 | 1.4 | 2.7  |
| m.10398A   | 56.0                                         | 18.3 | 11.2 | 0.4  | 1.7  | 3.9 | 0.0  | 3.1 | 1.2 | 0.0  | 1.4 | 2.7 | 0.0  |
| m.15043A   | 0.0                                          | 0.0  | 20.7 | 0.0  | 0.0  | 0.0 | 47.4 | 0.9 | 0.0 | 26.7 | 0.0 | 4.3 | 0.0  |
| m.15043G   | 47.6                                         | 15.5 | 8.5  | 10.5 | 6.8  | 3.3 | 0.0  | 2.6 | 1.0 | 0.0  | 1.2 | 2.4 | 0.5  |
| m.15218G   | 5.3                                          | 91.0 | 0.0  | 0.8  | 0.0  | 0.0 | 0.0  | 3.0 | 0.0 | 0.0  | 0.0 | 0.0 | 0.0  |
| m.15218A   | 47.7                                         | 10.6 | 9.6  | 10.6 | 6.8  | 3.4 | 2.3  | 2.5 | 1.0 | 1.3  | 1.2 | 2.6 | 0.4  |

**Supplementary Table 3. Distribution of genogeographic affinities of schizophrenic persons with specific SNPs.**

| SNP-allele | Geographical origin (number of persons) |                    |                 |                         |                                   |                    |                 |                 |
|------------|-----------------------------------------|--------------------|-----------------|-------------------------|-----------------------------------|--------------------|-----------------|-----------------|
|            | Denmark<br>(716)                        | Greenland<br>(592) | Europe<br>(157) | Middle<br>East<br>(163) | Central<br>South<br>Asia<br>(200) | East Asia<br>(228) | Africa<br>(101) | Oceania<br>(27) |
| m.1438A    | 92.6                                    | 0.0                | 5.8             | 0.8                     | 0.8                               | 0.0                | 0.0             | 0.0             |
| m.1438G    | 87.7                                    | 0.1                | 7.8             | 2.4                     | 1.8                               | 0.1                | 0.0             | 0.0             |
| m.3197C    | 92.8                                    | 0.0                | 4.8             | 1.4                     | 1.0                               | 0.0                | 0.0             | 0.0             |
| m.3197T    | 87.5                                    | 0.1                | 7.9             | 2.4                     | 1.8                               | 0.1                | 0.0             | 0.0             |
| m.3666A    | 80.0                                    | 0.0                | 20.0            | 0.0                     | 0.0                               | 0.0                | 0.0             | 0.0             |
| m.3666G    | 88.0                                    | 0.1                | 7.6             | 2.3                     | 1.7                               | 0.1                | 0.0             | 0.0             |
| m.4769A    | 90.5                                    | 0.0                | 5.2             | 1.7                     | 2.6                               | 0.0                | 0.0             | 0.0             |
| m.4769G    | 87.9                                    | 0.1                | 7.8             | 2.4                     | 1.7                               | 0.1                | 0.0             | 0.0             |
| m.9377A    | 88.1                                    | 0.1                | 7.7             | 2.3                     | 1.7                               | 0.1                | 0.0             | 0.0             |
| m.9377G    | 80.0                                    | 0.0                | 0.0             | 6.7                     | 6.7                               | 6.7                | 0.0             | 0.0             |
| m.10398G   | 83.3                                    | 0.0                | 8.5             | 3.7                     | 3.7                               | 0.6                | 0.2             | 0.0             |
| m.10398A   | 89.1                                    | 0.1                | 7.5             | 2.0                     | 1.3                               | 0.0                | 0.0             | 0.0             |
| m.15043A   | 66.4                                    | 0.0                | 12.9            | 1.7                     | 16.4                              | 2.6                | 0.0             | 0.0             |
| m.15043G   | 89.0                                    | 0.1                | 7.4             | 2.4                     | 1.0                               | 0.0                | 0.0             | 0.0             |
| m.15218G   | 88.0                                    | 0.0                | 6.0             | 3.8                     | 2.3                               | 0.0                | 0.0             | 0.0             |
| m.15218A   | 88.0                                    | 0.1                | 7.8             | 2.2                     | 1.7                               | 0.1                | 0.0             | 0.0             |
